# Supplementary material
Source: Research Square preprint supplement (doi:10.21203/rs.3.rs-7981548/v1)
Supplement: Supplementary file 1 [file bf6bf6c21f285425e6bfb1a7.docx]

| **N.** | **Techno-typological characteristics** | **Length cm** | **Width cm** | **Thickness**  **cm** |
| --- | --- | --- | --- | --- |
| 1 | Retouched flake, made of yellowish/beige microbrecciated flint, interpretable as a latero-déjeté scraper, with marginal, direct, continuous retouch on the left side and on part of the transverse distal edge; smooth platform, with bidirectional dorsal negatives. | 3.8 | 2.9 | 1.0 |
| 2 | Unretouched flake, made of yellowish/beige microbrecciated flint, rectangular in shape and with a smooth platform, showing bidirectional dorsal negatives and iron-oxide residues on the dorsal and ventral surfaces | 3.5 | 2.4 | 1.1 |
| 3 | Core fragment from opportunistic débitage, on a grey aphanitic flint slab, showing a series of multiple removals (6) derived from non-orientable striking platforms, obtained by direct percussion with a hard hammer. | 3.5 | 2.4 | 1.1 |
| 4 | Proximal fragment of an unretouched flake, in yellowish/beige aphanitic flint, with iron-oxide residues along the right lateral edge. | 2.2 | 1.3 | 0.5 |
| 5 | Medial fragment of unretouched flake, made of yellowish/beige microbrecciated flint | 2.4 | 2.0 | 0.8 |
| 6 | Medial fragment of unretouched flake, made of yellowish/beige microbrecciated flint | 1.5 | 1.2 | 0.4 |
| 7 | Small unretouched flake, interpreted as knapping debris, with smooth platform, made of yellowish/beige microbrecciated flint | 1.6 | 1.4 | 0.5 |
| 8 | Medial fragment of unretouched flake, made of yellowish/beige microbrecciated flint | 1.4 | 1.3 | 0.4 |
| 9 | Medial fragment of unretouched flake, made of yellowish/beige microbrecciated flint | 1.5 | 0.9 | 0.5 |
| 10 | Medial fragment of unretouched flake, made of yellowish/beige microbrecciated flint | 1.7 | 0.9 | 0.4 |
| 11 | Small unretouched flake, interpreted as knapping debris, with a linear platform, made of yellowish/beige microbrecciated flint | 1.5 | 1.0 | 0.3 |
| 12 | Proximal fragment of an unretouched flake, in whitish microbrecciated flint | 1.1 | 1.4 | 0.3 |
| 13 | Small unretouched flake, interpreted as knapping debris, with a punctiform platform, made of light grey aphanitic flint | 1.9 | 1.0 | 0.4 |
| 14 | Small unretouched flake, interpreted as knapping debris, with a linear platform, made of yellowish/beige microbrecciated flint | 1.1 | 1.0 | 0.2 |
| 15 | Small flake, with a linear platform, made of light grey aphanitic flint and showing a whitish patina on the dorsal surface | 2.0 | 1.0 | 0.5 |
| 16 | Medial fragment of unretouched flake, made of yellowish/beige aphanitic flint | 1.0 | 0.8 | 0.5 |

Table 2: Techno-typological features of the flints recognized in the 4.10-4.40 interval of the borehole
