# Supplementary material
Source: Research Square preprint supplement (doi:10.21203/rs.3.rs-7981548/v1)
Supplement: Supplementary file 2 [file c06a691dde481abf50d96fd6.xlsx]

## Sheet: Foglio1
Table S1. Complete 40Ar/39Ar data
	Sample:	IS0 4.5			Identifier:	UW171:B29
	Material:	Sanidine
															Corrected1										Blanks																				Reactor corrections
	N	Power	Age	±1σ	K/Ca	±1σ	Cum. %39Ar	%40Ar*	40Ar*/39ArK	±1σ	39Ar/40Ar	±1σ	36Ar/40Ar	±1σ	40Ar	±1σ	39Ar	±1σ	38Ar	±1σ	37Ar	±1σ	36Ar	±1σ	40Ar	±1σ	39Ar	±1σ	38Ar	±1σ	37Ar	±1σ	36Ar	±1σ	RunDate	Δt3	J	±1σ	39Ar Decay	37Ar Decay	LambdaK	MonitorAge	MonitorName	MonitorMaterial	(40Ar/3939)K	±1σ	(38Ar/3939)K	±1σ	(37Ar/3939)K
		%	(ka)	(ka)			(%)	(%)							(cps)		(cps)		(cps)		(cps)		(cps)		(cps)		(cps)		(cps)		(cps)		(cps)			(days)
X	03A	30	437.974	1.45168	106.288	3.08611	11.7246	72.8333	0.600742	0.00199142	1.21346	0.00105402	0.000907764	7.54547e-06	457495	384.553	554521	103.281	6808.55	43.9252	1160.26	31.6284	415.537	3.43086	4014.35	8.57349	107.842	2.06505	15.9914	0.360884	52.0281	1.27114	23.7211	0.467954	2024-05-24 22:14:18	36.2724	0.000398403	1.24982e-07	1.00026	2.04575	5.464e-10	1.1864	ACS-2	sanidine	0.00073	9e-05	0.01215	3e-05	0.000224
X	08A	30	396.851	1.33292	117.777	3.53775	13.6888	97.3939	0.544329	0.00182847	1.79159	0.0017155	8.30219e-05	1.04945e-05	51933.8	47.2634	92898.7	22.8158	1109.81	20.0498	175.912	4.92599	4.39669	0.544277	4233.01	8.92314	104.735	1.88817	16.6648	0.386202	54.7193	1.40883	25.1699	0.47403	2024-05-25 01:39:43	36.4151	0.000398403	1.24982e-07	1.00026	2.05152	5.464e-10	1.1864	ACS-2	sanidine	0.00073	9e-05	0.01215	3e-05	0.000224
X	09A	30	952.051	5.45045	421.071	40.1901	14.2129	95.3364	1.30605	0.00747904	0.730348	0.000772032	0.0001545	1.79567e-05	33969.3	31.4185	24789.8	12.5537	291.183	10.607	15.0767	1.16471	5.25165	0.609625	4260.72	9.92	105.202	2.10667	16.5912	0.43013	54.5609	1.58867	25.1488	0.531006	2024-05-25 01:56:43	36.4269	0.000398403	1.24982e-07	1.00026	2.052	5.464e-10	1.1864	ACS-2	sanidine	0.00073	9e-05	0.01215	3e-05	0.000224
X	10A	30	394.015	4.40131	130.016	4.77027	14.7915	95.7771	0.540439	0.00603758	1.7745	0.00248146	0.000137287	3.55806e-05	15444.9	20.1476	27364.5	12.9318	345.312	11.091	47.1792	1.60719	2.1429	0.548813	4168.5	8.43101	107.452	1.73822	16.6963	0.354315	50.9455	1.29372	24.3257	0.449499	2024-05-25 02:43:43	36.4595	0.000398403	1.24982e-07	1.00026	2.05332	5.464e-10	1.1864	ACS-2	sanidine	0.00073	9e-05	0.01215	3e-05	0.000224
X	11A	30	533.2	9.77159	83.101	2.3953	17.7446	28.8502	0.731377	0.0134054	0.394578	0.000318969	0.00238282	1.74456e-05	354165	275.597	139670	30.0574	1838.92	19.6789	368.064	10.1111	843.864	6.14171	4102.09	8.6617	108.454	1.71132	16.7947	0.348193	49.0151	1.24288	23.8782	0.458261	2024-05-25 03:00:44	36.4713	0.000398403	1.24982e-07	1.00026	2.0538	5.464e-10	1.1864	ACS-2	sanidine	0.00073	9e-05	0.01215	3e-05	0.000224
X	12A	30	439.293	2.09854	122.138	3.75895	19.1421	93.8228	0.602552	0.00287879	1.55886	0.0015623	0.000203322	1.4655e-05	42459	40.1691	66095.7	19.5456	765.135	15.1188	120.785	3.45709	8.68369	0.621465	4035.62	10.189	109.457	1.95955	16.8932	0.3982	47.0828	1.39871	23.4302	0.536593	2024-05-25 03:17:46	36.4832	0.000398403	1.24982e-07	1.00026	2.05428	5.464e-10	1.1864	ACS-2	sanidine	0.00073	9e-05	0.01215	3e-05	0.000224
	13A	30	385.505	1.64113	121.291	3.58352	23.0752	74.4653	0.528766	0.00225124	1.40973	0.00141441	0.000852696	1.00913e-05	132121	128.428	186017	38.8603	2259.85	24.1581	341.942	9.39225	112.721	1.32729	3999.5	8.99196	117.69	1.86249	17.9302	0.36027	44.4518	1.25515	23.3646	0.481059	2024-05-25 04:04:48	36.5158	0.000398403	1.24982e-07	1.00026	2.05561	5.464e-10	1.1864	ACS-2	sanidine	0.00073	9e-05	0.01215	3e-05	0.000224
X	14A	30	441.248	0.508797	99.8481	2.88686	34.6485	95.579	0.605234	0.00069797	1.58103	0.00134171	0.000144381	2.36401e-06	346696	286.548	547366	67.4485	6556.05	48.5592	1209.17	32.9611	50.6309	0.817344	4015.3	8.72761	121.738	2.00745	18.4553	0.365899	44.0295	1.26701	23.5703	0.478848	2024-05-25 04:21:49	36.5277	0.000398403	1.24982e-07	1.00026	2.05609	5.464e-10	1.1864	ACS-2	sanidine	0.00073	9e-05	0.01215	3e-05	0.000224
X	15A	30	435.36	0.650693	110.437	3.22635	40.6239	96.831	0.597156	0.000892621	1.62346	0.00145721	0.000102298	3.81564e-06	174329	147.812	282609	71.2507	3385.29	42.5641	567.267	15.5171	18.1073	0.664142	4031.07	9.89209	125.778	2.42312	18.9793	0.427284	43.6081	1.47402	23.7756	0.552133	2024-05-25 04:38:48	36.5394	0.000398403	1.24982e-07	1.00026	2.05656	5.464e-10	1.1864	ACS-2	sanidine	0.00073	9e-05	0.01215	3e-05	0.000224
X	16A	30	435.834	0.541736	106.333	3.09046	49.7538	98.1592	0.597807	0.000743154	1.64396	0.00157028	5.77094e-05	2.55281e-06	263044	244.796	431806	64.4617	5217.86	48.6832	897.802	24.4978	15.633	0.67039	4042.62	9.98388	127	2.47922	19.3518	0.435423	45.1428	1.4986	23.9691	0.558904	2024-05-25 05:25:47	36.5721	0.000398403	1.24982e-07	1.00026	2.05789	5.464e-10	1.1864	ACS-2	sanidine	0.00073	9e-05	0.01215	3e-05	0.000224
X	17A	30	394.056	3.65637	139.388	4.93743	50.5144	91.0573	0.540495	0.00501569	1.68678	0.00207844	0.000295772	2.80411e-05	21358.3	24.5867	35973.1	14.6757	433.273	12.054	57.9724	1.89412	6.33916	0.598118	4040.48	9.11258	125.464	2.26309	19.2742	0.39968	46.2472	1.37158	23.9658	0.509167	2024-05-25 05:43:06	36.5841	0.000398403	1.24982e-07	1.00026	2.05838	5.464e-10	1.1864	ACS-2	sanidine	0.00073	9e-05	0.01215	3e-05	0.000224
X	18A	30	436.727	6.05642	116.357	3.41145	56.9354	34.9557	0.599032	0.00830821	0.583785	0.000486691	0.0021781	1.59507e-05	520555	425.07	303685	47.9095	3840.92	27.0336	579.597	15.849	1133.64	8.24755	4038.37	8.53059	123.955	2.1189	19.1979	0.377635	47.3325	1.28981	23.9625	0.475148	2024-05-25 06:00:07	36.5959	0.000398403	1.24982e-07	1.00026	2.05886	5.464e-10	1.1864	ACS-2	sanidine	0.00073	9e-05	0.01215	3e-05	0.000224
X	19A	30	394.613	1.65267	123.917	3.78312	58.6003	95.4826	0.54126	0.00226709	1.76636	0.00188386	0.000147183	1.29313e-05	44647.7	45.2281	78742	22.7079	951.592	15.8213	141.546	4.01332	6.63653	0.576556	4032.55	8.70246	119.786	2.16287	18.9873	0.397608	50.3301	1.33671	23.9534	0.479248	2024-05-25 06:47:07	36.6286	0.000398403	1.24982e-07	1.00026	2.06019	5.464e-10	1.1864	ACS-2	sanidine	0.00073	9e-05	0.01215	3e-05	0.000224
	20A	30	385.448	2.34109	132.436	4.17372	59.9795	83.8084	0.528688	0.00321142	1.58705	0.00157704	0.000539071	1.67507e-05	41160.7	38.4932	65231.8	19.5915	770.369	10.1574	110.147	3.20782	22.2186	0.688341	4030.45	9.38859	118.277	2.3337	18.911	0.431786	51.4154	1.44693	23.9502	0.515748	2024-05-25 07:04:08	36.6404	0.000398403	1.24982e-07	1.00026	2.06067	5.464e-10	1.1864	ACS-2	sanidine	0.00073	9e-05	0.01215	3e-05	0.000224
X	22A	30	391.26	2.00117	133.007	4.21484	61.2522	93.9175	0.53666	0.00274514	1.75228	0.00196088	0.000199703	1.56741e-05	34404.4	36.284	60193.6	20.146	753.822	14.7561	101.143	2.96107	6.9159	0.53851	3992.79	8.57475	113.059	2.00038	18.1535	0.37731	45.9422	1.30734	23.8035	0.451179	2024-05-25 08:08:12	36.6849	0.000398403	1.24982e-07	1.00026	2.06248	5.464e-10	1.1864	ACS-2	sanidine	0.00073	9e-05	0.01215	3e-05	0.000224
X	23A	30	391.957	3.26449	161.185	6.02811	62.0316	92.6939	0.537616	0.00447813	1.72634	0.00210002	0.000240799	2.55771e-05	21383.1	23.9701	36858.5	16.2916	445.99	13.1027	51.7942	1.76415	5.16902	0.54619	3974.16	8.82704	111.81	1.87141	17.8157	0.362308	41.7099	1.32319	23.7256	0.437819	2024-05-25 08:25:12	36.6967	0.000398403	1.24982e-07	1.00026	2.06296	5.464e-10	1.1864	ACS-2	sanidine	0.00073	9e-05	0.01215	3e-05	0.000224
	24A	30	384.817	3.78528	122.283	4.32808	62.7158	90.5161	0.527822	0.0051925	1.71705	0.00223898	0.000313854	2.95485e-05	18876.4	23.0179	32362.7	13.9317	364.498	12.7545	58.8123	1.94089	5.94601	0.557014	3955.51	10.3931	110.559	2.06277	17.4776	0.40749	37.4735	1.54213	23.6475	0.496187	2024-05-25 08:42:13	36.7085	0.000398403	1.24982e-07	1.00026	2.06344	5.464e-10	1.1864	ACS-2	sanidine	0.00073	9e-05	0.01215	3e-05	0.000224
X	25A	30	435.136	1.85473	99.4232	2.91395	65.2173	77.5154	0.596849	0.00254432	1.29998	0.00127322	0.000750639	1.05891e-05	91116.7	85.7526	118307	28.5052	1413.92	20.7904	261.308	7.22403	68.4673	0.961721	3971.71	9.00333	111.527	1.83301	17.3285	0.365098	37.4843	1.38604	23.689	0.45784	2024-05-25 09:29:15	36.7411	0.000398403	1.24982e-07	1.00026	2.06477	5.464e-10	1.1864	ACS-2	sanidine	0.00073	9e-05	0.01215	3e-05	0.000224
X	26A	30	527.417	3.94737	137.297	4.1627	67.8269	53.7565	0.723443	0.00541528	0.743468	0.000625672	0.00154791	1.31638e-05	166146	134.417	123425	27.1675	1528.83	16.6382	201.06	5.60878	257.142	2.17589	3990.8	8.44515	112.741	1.83329	17.428	0.366881	39.7773	1.3831	23.7542	0.477075	2024-05-25 09:46:15	36.753	0.000398403	1.24982e-07	1.00026	2.06525	5.464e-10	1.1864	ACS-2	sanidine	0.00073	9e-05	0.01215	3e-05	0.000224
X	27A	30	394.772	5.59043	127.138	5.10609	68.346	91.4446	0.541478	0.00766879	1.69088	0.00245169	0.000282776	4.31652e-05	14540.3	19.6659	24549.2	12.1457	301.214	11.0597	42.9632	1.60718	4.12919	0.626827	4009.89	9.3142	113.955	2.11815	17.5274	0.425174	42.0704	1.59563	23.8195	0.565095	2024-05-25 10:03:15	36.7648	0.000398403	1.24982e-07	1.00026	2.06574	5.464e-10	1.1864	ACS-2	sanidine	0.00073	9e-05	0.01215	3e-05	0.000224
X	28A	30	436.737	1.46681	106.817	3.18841	70.2102	96.937	0.599045	0.00201217	1.62011	0.00169963	9.87513e-05	1.03402e-05	54501.1	54.6362	88170.6	23.6275	1065.3	23.2854	181.724	5.09326	5.47141	0.562845	3968.91	8.31582	112.804	1.87754	17.694	0.374359	43.3641	1.39115	23.7876	0.492087	2024-05-25 10:50:39	36.7977	0.000398403	1.24982e-07	1.00026	2.06708	5.464e-10	1.1864	ACS-2	sanidine	0.00073	9e-05	0.01215	3e-05	0.000224
X	29A	30	398.103	3.34709	111.598	3.56287	71.147	79.5906	0.546048	0.00459145	1.45913	0.00153701	0.000680754	2.2171e-05	30405.8	29.8531	44307.4	15.7314	492.896	9.06321	87.5927	2.62064	20.7201	0.673087	3935.48	8.34748	111.49	1.83411	17.7317	0.361475	42.8145	1.324	23.7338	0.462708	2024-05-25 11:07:39	36.8095	0.000398403	1.24982e-07	1.00026	2.06756	5.464e-10	1.1864	ACS-2	sanidine	0.00073	9e-05	0.01215	3e-05	0.000224
X	30A	30	606.587	3.4018	163.296	6.09535	71.9498	96.5981	0.832057	0.00466702	1.16194	0.00122064	0.000111198	1.78221e-05	32711.4	31.7493	37966.7	14.6432	449.447	9.89777	52.5854	1.78517	3.66067	0.582473	3902.09	9.67724	110.176	2.08819	17.7694	0.408173	42.2656	1.4791	23.6799	0.512077	2024-05-25 11:24:38	36.8213	0.000398403	1.24982e-07	1.00026	2.06804	5.464e-10	1.1864	ACS-2	sanidine	0.00073	9e-05	0.01215	3e-05	0.000224
	31A	30	385.038	2.692	164.456	5.78256	72.9457	91.5445	0.528126	0.00369279	1.73558	0.00200327	0.000279324	2.11218e-05	27179.9	29.382	47101.1	17.3676	539.73	13.6562	64.7711	2.06614	7.61368	0.573294	3896.58	8.64439	114.744	1.92982	17.6189	0.36226	42.5373	1.34521	23.6501	0.469306	2024-05-25 12:11:40	36.8539	0.000398403	1.24982e-07	1.00026	2.06938	5.464e-10	1.1864	ACS-2	sanidine	0.00073	9e-05	0.01215	3e-05	0.000224
X	32A	30	395.725	4.10008	119.558	4.18206	73.5843	91.0534	0.542785	0.00562437	1.67958	0.002154	0.00029592	3.13541e-05	18010	21.432	30204.3	13.5679	357.606	9.50079	55.8923	1.82566	5.35177	0.56395	3911.61	8.58172	118	2.01579	17.5147	0.359393	42.9861	1.38495	23.6626	0.489266	2024-05-25 12:28:40	36.8657	0.000398403	1.24982e-07	1.00026	2.06986	5.464e-10	1.1864	ACS-2	sanidine	0.00073	9e-05	0.01215	3e-05	0.000224
X	33A	30	505.735	1.046	150.656	4.51562	84.5854	82.1046	0.693698	0.00143496	1.1846	0.000940194	0.000597013	5.02478e-06	439716	340.46	520303	69.7988	6319.41	48.1254	775.511	21.1778	262.689	2.19795	3926.65	9.88039	121.259	2.39371	17.4104	0.413597	43.4354	1.63103	23.6751	0.580367	2024-05-25 12:45:41	36.8776	0.000398403	1.24982e-07	1.00026	2.07034	5.464e-10	1.1864	ACS-2	sanidine	0.00073	9e-05	0.01215	3e-05	0.000224
X	34A	30	423.681	1.50579	128.42	3.91781	86.4659	94.6172	0.581135	0.00206563	1.63008	0.00161922	0.000176522	1.07795e-05	54640.1	51.6118	88939	23.6444	1102.74	24.8053	153.751	4.34291	9.7156	0.588208	3923.09	8.54133	118.262	2.09552	17.698	0.371165	43.392	1.42055	23.1202	0.499	2024-05-25 13:32:43	36.9102	0.000398403	1.24982e-07	1.00026	2.07168	5.464e-10	1.1864	ACS-2	sanidine	0.00073	9e-05	0.01215	3e-05	0.000224
X	35A	30	435.932	0.980766	126.135	3.77706	89.1919	97.4292	0.597941	0.00134542	1.63135	0.00138576	8.22203e-05	6.78026e-06	79145.6	63.8121	128927	28.3331	1544.32	24.4116	226.613	6.28983	6.61725	0.535942	3913	8.07805	114.833	2.00171	17.9145	0.372075	43.1254	1.34929	22.8045	0.462152	2024-05-25 13:49:43	36.922	0.000398403	1.24982e-07	1.00026	2.07216	5.464e-10	1.1864	ACS-2	sanidine	0.00073	9e-05	0.01215	3e-05	0.000224
X	37A	30	393.592	3.33445	132.901	4.41016	90.0826	86.3167	0.53986	0.0045741	1.60074	0.00202243	0.000454931	2.4171e-05	26353.9	30.551	42125.6	20.1127	531.66	16.6107	70.4437	2.16201	12.0132	0.636092	3851.26	7.88232	107.191	2.0054	17.0064	0.37726	44.6493	1.32719	21.9412	0.447719	2024-05-25 14:53:46	36.9665	0.000398403	1.24982e-07	1.00026	2.07398	5.464e-10	1.1864	ACS-2	sanidine	0.00073	9e-05	0.01215	3e-05	0.000224
X	38A	30	395.068	3.24508	136.082	4.72916	90.8282	88.5034	0.541884	0.0044515	1.6352	0.00187856	0.00038153	2.40838e-05	21595.5	22.9146	35261.7	14.5024	426.309	10.5414	57.6628	1.85152	8.25945	0.519399	3827.96	7.73785	106.697	2.01762	16.2629	0.363345	45.7907	1.31046	21.8069	0.448588	2024-05-25 15:10:47	36.9783	0.000398403	1.24982e-07	1.00026	2.07447	5.464e-10	1.1864	ACS-2	sanidine	0.00073	9e-05	0.01215	3e-05	0.000224
X	39A	30	425.46	2.63452	106.219	3.31752	91.9241	88.9155	0.583576	0.00361402	1.52533	0.00162824	0.000367948	1.81227e-05	34026.7	33.746	51830.9	19.0139	600.331	10.3927	106.989	3.14118	12.561	0.615834	3804.63	8.84222	106.202	2.34312	15.5187	0.409636	46.9334	1.50342	21.6724	0.519593	2024-05-25 15:27:49	36.9902	0.000398403	1.24982e-07	1.00026	2.07495	5.464e-10	1.1864	ACS-2	sanidine	0.00073	9e-05	0.01215	3e-05	0.000224
X	40A	30	436.051	3.3084	113.639	3.75176	92.6837	90.9071	0.598104	0.00453847	1.52161	0.00192175	0.000301175	2.27488e-05	23644.3	27.8165	35928.2	15.6111	431.255	7.6668	69.5287	2.14949	7.14958	0.537209	3747.44	8.01192	107.236	2.04445	15.2549	0.358797	44.4294	1.37254	21.8386	0.468399	2024-05-25 16:14:49	37.0228	0.000398403	1.24982e-07	1.00026	2.07629	5.464e-10	1.1864	ACS-2	sanidine	0.00073	9e-05	0.01215	3e-05	0.000224
X	41A	30	504.891	0.763918	143.341	4.31342	96.8506	98.8071	0.69254	0.00104798	1.42822	0.00126662	3.65056e-05	4.03947e-06	138164	118.184	197073	37.7498	2325.57	28.1481	306.684	8.45338	5.19436	0.557482	3727.64	8.14992	108.101	1.95122	15.5164	0.348515	42.3636	1.4089	22.0082	0.471	2024-05-25 16:32:16	37.0349	0.000398403	1.24982e-07	1.00026	2.07679	5.464e-10	1.1864	ACS-2	sanidine	0.00073	9e-05	0.01215	3e-05	0.000224
X	42A	30	532.165	3.11211	60.4791	1.77372	97.766	92.7379	0.729957	0.00426942	1.27164	0.00135058	0.000240355	1.78392e-05	34087.6	33.5621	43295.7	16.3977	515.921	12.9115	153.253	4.34442	8.26819	0.607464	3708.36	9.52471	108.945	2.18687	15.7712	0.395504	40.3511	1.65529	22.1735	0.546644	2024-05-25 16:49:16	37.0467	0.000398403	1.24982e-07	1.00026	2.07727	5.464e-10	1.1864	ACS-2	sanidine	0.00073	9e-05	0.01215	3e-05	0.000224
X	43A	30	504.292	2.70589	126.355	4.12602	98.8279	94.2974	0.69172	0.00371208	1.36459	0.00153647	0.000187859	1.65462e-05	36849.8	39.2627	50221.8	17.0284	605.739	13.4254	87.8562	2.66402	6.96162	0.609063	3668.66	9.6849	108.747	2.20754	16.1308	0.401547	40.8377	1.67461	22.0882	0.55314	2024-05-25 17:36:20	37.0794	0.000398403	1.24982e-07	1.00026	2.07861	5.464e-10	1.1864	ACS-2	sanidine	0.00073	9e-05	0.01215	3e-05	0.000224
X	44A	30	396.893	3.28775	130.403	4.17293	100	64.8282	0.544388	0.00451005	1.19188	0.00117861	0.00117616	1.77096e-05	46563.5	42.9784	55435.5	18.6128	662.497	8.12623	94.13	2.78837	54.7667	0.822322	3657	8.88171	108.18	2.03308	16.1931	0.371736	42.1984	1.51757	21.9512	0.504048	2024-05-25 17:53:20	37.0912	0.000398403	1.24982e-07	1.00026	2.0791	5.464e-10	1.1864	ACS-2	sanidine	0.00073	9e-05	0.01215	3e-05	0.000224
Weighted mean K/Ca ±2σ					130.367	16.5503	SEM, but if MSWD>1 use SEM * sqrt(MSWD)
Weighted mean Age ±2σ			385.344	2.30457	n=4/36	MSWD=*0.015
Isochron Age ±2σ			384.888	5.65094		MSWD=*0.006
(40Ar/36Ar)trapped ±2σ			300.042	16.7295
[truncated: 9 more columns]
